# Supplementary material for: Redox chemosensors: coordination chemistry towards CuII, ZnII, CdII, HgII, and PbII of 1-aza-4,10-dithia-7-oxacyclododecane ([12]aneNS2O) and its N-ferrocenylmethyl derivativeElectronic supplementary information (ESI) available: synthetic details including analytical and spectroscopic data for the isolated complexes. Ortep views of the coordination sphere around the metal centres in 1, 2 and 5. See http://www.rsc.org/suppdata/dt/b2/b210806m/
Source: Royal Society of Chemistry journal article supplement (doi:10.1039/b210806m), 2003-02-05
Supplement: b210806m.doc [file b210806m.doc]

# Electronic Supplementary Information for the paper

**Redox chemosensors: coordination chemistry towards CuII, ZnII, CdII, HgII, and PbII of 1-aza-4,10-dithia-7-oxacyclododecane ([12]aneNS2O) and its *N*-ferrocenylmethyl derivative**

C. Caltagirone, A. Bencini, F. Demartin, F.A. Devillanova, A. Garau, F. Isaia, V. Lippolis,*, P.Mariani,U. Papke, L. Tei, G. Verani

**Synthesis of [Cu([12]aneNS2O)Cl2] (1).** [12]aneNS2O (40 mg, 0.1931 mmol) was dissolved in MeCN (5 mL) and CuCl2·2H2O (25.96, 0.1931 mmol) was added. The resulting green solution was stirred at room temperature for four hours. Colourless single crystals suitable for X-ray structural analysis were obtained by diffusion of Et2O vapour into the reaction mixture (39 mg, 59% yield). M.p.: 164-166°C. Elem. Anal. found (calc. for C8H17Cl2CuNOS2): C, 28.20 (28.11); H, 4.99 (5.01); N, 4.18 (4.10); S, 18.54 (18.76). FAB mass spectrum (3-NOBA matrix): m/z 305, 270; calc. for [63Cu([12]aneNS2O)Cl]+ and [63Cu([12]aneNS2O)]+ 306 and 271, respectively. UV-vis spectrum (MeCN): max = 298 (max = 5733), 371 (3967), 789 nm (4675 dm3 mol1 cm1).

**Synthesis of [Cu([12]aneNS2O)Br2] (2).** CuBr2 (43 mg, 0,1931 mmol) was added to a solution of [12]aneNS2O (40 mg, 0.1931 mmol) in MeCN (5 mL) and the resulting dark green solution was stirred at room temperature for 4 hours. A dark green precipitate (57% yield) formed, which was filtered and re-crystallised in CH3CN by diffusion of Et2O vapours. M.p.: 160-162°C. Elem. Anal.found (calc. for C8H17Br2CuNOS2): C, 22.32 (22.31); H, 3.83 (3.98); N, 3.41 (3.25); S, 14.87 (14.89). FAB mass spectrum (3-NOBA matrix): m/z 349, 270; calc. for [63Cu([12]aneNS2O)Br]+ and [63Cu([12]aneNS2O)]+ 350 and 271, respectively. UV-vis spectrum (MeCN): max = 271 (max = 3525), 357 (5450), 739 nm (4367 dm3 mol1 cm1).

**Synthesis of [Cu([12]aneNS2O)(NO3)2] (3).** Cu(NO3)23 H2O (46.7 mg, 0.1931 mmol) was added to a solution of [12]aneNS2O (40 mg, 0.1931 mmol) in CH3CN (5 mL). The resulting dark green solution was stirred at room temperature for two hours. Blue crystals (51% yield) were obtained by diffusion of Et2O vapours into the reaction mixuture. Elem. Anal. found (calc. for C8H17CuN3O7S2): C, 24.43 (24.33); H, 4.48 (4.34); N, 10.34 (10.64); S, 15.98 (16.24). UV-vis spectrum (MeCN): max = 680 (max 211 dm3 mol1 cm1).

**Synthesis of [Zn([12]aneNS2O)](ClO4)2 (4).** Zn(ClO4)2 6H2O (111.9 mg, 0.1931 mmol) was added to a solution of [12]aneNS2O (40 mg, 0.1931 mmol) in 5 ml of MeCN (5 mL). The solution was stirred at room temperature for four hours. The solvent was partially removed under reduced pressure and the complex was obtained by diffusion of Et2O vapour into the remaining solution (41.9 mg, 0.089 mol, 46% yield). Mp.: over 250°C. Elem. Anal. found (calc. for C8H17Cl2NO9S2Zn): C, 20.33 (20.37); H, 3.76 (3.63); N, 3.05 (2.97); S, 13.65 (13.59). FAB mass spectrum (3-NOBA matrix): *m/z* 372, 272; calc. for [64Zn([12]aneNS2O)ClO4]+ and [64Zn([12]aneNS2O)]+ 372 and 272, respectively. 13C-NMR(400 MHz, CD3CN): C 29.9 (S*C*H2CH2N), 30.7 (S*C*H2CH2O), 45.8 (N*C*H2), 71.2 (O*C*H2).

**Synthesis of [Cd([12]aneNS2O)(NO3)2] (5).** A mixture of [12]aneNS2O (40 mg, 0.1931 mmol) and Cd(NO3)2·4H2O (56 mg, 0.931 mmol) in MeCN (5 mL) was stirred at room temperature for three hours. The solvent was partially removed under reduced pressure and the product crystallised by diffusion of Et2O vapour into the reaction solution. Colourless crystals were obtained (38.5 mg, 45% yield). M.p.: greater than 250°C. Elem. Anal. found (calc. for C8H17CdN3O7S2): C, 21.55 (21.65); H, 3.61 (3.86); N, 9.35 (9.47); S, 14.30 (14.45). FAB mass spectrum (3-NOBA matrix): *m/z* 382; calc. for [114Cd([12]aneNS2O)NO3]+ 382. 13C-NMR(400 MHz, CD3CN): C 31.39 (S*C*H2CH2N), 33.08 (S*C*H2CH2O), 45.03 (N*C*H2), 67.14 (O*C*H2).

**Synthesis of [Hg([12]aneNS2O)MeCN](ClO4)2 (6).** A mixture of Hg(ClO4)2·3H2O (87.57 mg, 0.1931 mmol) and [12]aneNS2O (40 mg, 0.1931 mmol) in MeCN (5 mL) was stirred for four hours at room temperature. The solvent was partially removed under reduced pressure and Et2O vapour was allowed to diffuse into the remaining solution. Colourless crystals suitable for X-ray structure were obtained (35.62 mg, 41% yield). M.p.:decomposition at 126°C. Elem. Anal. found (calc. for C10H20Cl2HgN2O9S2): C, 18.50 (18.54); H, 3.09 (3.11); N, 4.30 (4.32); S, 9.80 (9.90). FAB mass spectrum (3-NOBA matrix): *m/z* 407; calc. for [202Hg([12]aneNS2O)]+ 408. 13C-NMR(400 MHz, CD3CN): C 33.91 (S*C*H2CH2N), 34.59 (S*C*H2CH2O), 42.96 (N*C*H2), 65.77 (O*C*H2).

**Synthesis di [Pb([12]aneNS2O)](ClO4)2 (7)**. A mixture of[12]aneNS2O (40 mg, 0.1931 mmol) and Pb(ClO4)2 (78 mg, 0.1931 mmol) MeOH (5 ml) was stirred at room temperature for four hours. The solvent was partially removed under reduced pressure and the product obtained as microcrystalline powder by diffusion of Et2O vapour into the remaining solution (62.7 mg, 0.1022 mol, 53% yield). Mp: decomposition at 250°C. Elem. Anal. found (calc. for C8H17Cl2NO9PbS2): C, 15.77 (15.66); H, 2.49 (2.79); N, 2.32 (2.28); S, 10.64 (10.45). FAB mass spectrum (3-NOBA matrix): *m/z* 414; calc. for [208Pb([12]aneNS2O)]+ 414. 13C-NMR(400 MHz, CD3CN): C 31.8 (S*C*H2CH2N), 32.1 (S*C*H2CH2O), 51.2 (N*C*H2), 71.4 (O*C*H2).

**Figure 1S.** ORTEP view of the complexes [Cu([12]aneNS2O)Cl2] with the adopted numbering scheme. Displacement ellipsoids are drawn at 30% probability and hydrogen atoms have been omitted for clarity.

**Figure 2S.** ORTEP view of the complexes [Cu([12]aneNS2O)Br2] with the adopted numbering scheme. Displacement ellipsoids are drawn at 30% probability and hydrogen atoms have been omitted for clarity.

**Figure 3S.** ORTEP view of the complex [Cd([12]aneNS2O)(NO3)2] (**5**) with the adopted numbering scheme. Displacement ellipsoids are drawn at 30% probability and hydrogen atoms have been omitted for clarity.
